1 Loss of function, missense, and intronic variants in *NOTCH1* confer different risks for  
2 left ventricular outflow tract obstructive heart defects in two European cohorts.

3

4

5 *NOTCH1* variants in congenital heart disease

6

7 Emmi Helle<sup>1,2,¶</sup>, Aldo Córdova-Palomera<sup>3¶</sup>, Tiina Ojala<sup>1</sup>, Priyanka Saha<sup>3</sup>, Praneetha  
8 Potiny<sup>3</sup>, Stefan Gustafsson<sup>4</sup>, Erik Ingelsson<sup>2,4</sup>, Michael Bamshad<sup>5, 6, 7</sup>, Deborah  
9 Nickerson<sup>6</sup>, Jessica X. Chong<sup>5</sup>, University of Washington Center for Mendelian  
10 Genomics, Euan Ashley<sup>2</sup>, James R Priest<sup>2,3</sup>.

11

12 <sup>1</sup> Children's Hospital, University of Helsinki, Helsinki, Finland

13 <sup>2</sup> Cardiovascular Medicine, Stanford University School of Medicine, Stanford, CA

14 <sup>3</sup> Department of Pediatrics, Division of Pediatric Cardiology Stanford University  
15 School of Medicine, Stanford, CA

16 <sup>4</sup> Department of Medical Sciences, Molecular Epidemiology and Science for Life  
17 Laboratory, Uppsala University, Uppsala, Sweden.

18 <sup>5</sup> Department of Pediatrics, University of Washington, Seattle, WA

19 <sup>6</sup> Department of Genome Sciences, University of Washington, Seattle, WA

20 <sup>7</sup> Division of Genetic Medicine, Seattle Children's Hospital, Seattle, WA

21

22 ¶ These authors contributed equally

23

24 Corresponding Author: James R Priest

25 E-mail: [jpriest@stanford.edu](mailto:jpriest@stanford.edu) (JRP)

26

27 **Abstract**

28

29 Loss of function variants in *NOTCH1* cause left ventricular outflow tract obstructive  
30 defects (LVOTO) in a small percentage of families. Clinical surveys report an  
31 increased prevalence of missense variants in *NOTCH1* in family members of  
32 individuals with LVOTO and other types of congenital heart disease (CHD).  
33 However, the risk conferred by rare variants in *NOTCH1* for LVOTO remains largely  
34 uncharacterized. In a cohort of 49 families affected by hypoplastic left heart  
35 syndrome, a severe form of LVOTO, we discovered predicted loss of function  
36 *NOTCH1* variants in 6% of individuals. Rare missense variants were found in an  
37 additional 16% of families. To make a quantitative estimate of the genetic risk posed  
38 by variants in *NOTCH1* for LVOTO, we studied associations of 400 coding and non-  
39 coding variants in *NOTCH1* in 271 adult cases and 333,571 controls from the UK  
40 Biobank. Two rare intronic variants in strong linkage disequilibrium displayed  
41 significant association with risk for LVOTO (g.chr9:139427582C>T, Odds Ratio 16.9,  
42  $p=3.12e-6$ ; g.chr9:139435649C>T, Odds Ratio 19.6,  $p = 2.44e-6$ ) amongst  
43 European-ancestry British individuals. This result was replicated in an independent  
44 analysis of 51 cases and 68,901 controls of non-European and mixed ancestry.  
45 We conclude that carrying rare predicted loss of function variants or either of two  
46 intronic variants in *NOTCH1* confer significant risk for LVOTO. Our approach  
47 demonstrates the utility of population-based datasets in quantifying the specific risk  
48 of individual variants for disease related phenotypes.

49

50

51

## 52 **Author summary**

53

54 Congenital heart defects are the most common class of birth defect and are present  
55 in 1% of live births. Although CHD cases are often clustered in families, and thus the  
56 causal variant(s) are seemingly inherited, finding genetic variants causing these  
57 defects has been challenging. With the knowledge that variation in the *NOTCH1*  
58 gene previously has been associated with CHDs affecting the left side of the heart,  
59 our aim was to further investigate the role of different types of *NOTCH1* variants in  
60 left sided CHDs in two cohorts – a cohort of Finnish families with severe lesions  
61 affecting the left side of the heart , and the UK Biobank population including  
62 individuals with less severe left-sided lesions such as bicuspid aortic valve,  
63 congenital aortic stenosis, and coarctation of the aorta. We found a causal loss-of-  
64 function *NOTCH1* variant in 6% of the families in the Finnish cohort and in the UK  
65 Biobank cohort, we identified two rare variants in the non-coding region of *NOTCH1*,  
66 associated with severe left-sided CHDs. These findings support screening of  
67 *NOTCH1* loss-of-function variants in patients with severe left sided congenital heart  
68 defects and suggests that non-coding region variants in *NOTCH1* play a role in  
69 CHDs.

70

71

## 72 **Introduction**

73 Congenital heart defects (CHDs) are the most common congenital malformations  
74 and occur in 0.8-1% of live births [1]. Left ventricular outflow tract obstruction  
75 (LVOTO) is a subtype of CHD affecting one or more structures on the left side of the  
76 heart – left ventricle, aortic valve and thoracic aorta. At its most severe, LVOTO  
77 defects manifest as hypoplastic left heart syndrome (HLHS), in which the left  
78 ventricle is underdeveloped, and the systemic circulation depends the persistence of  
79 fetal circulatory physiology. Other common LVOTO defects include aortic coarctation  
80 (CoA), congenital aortic stenosis (AS), and bicuspid aortic valve (BAV) [1].

81

82 The genetic basis of non-syndromic LVOTO defects is largely unknown. Non-  
83 syndromic LVOTO defects frequently recur within a family, but often display variable  
84 expressivity [2]. LVOTO defects putatively caused by *NOTCH1* variants were initially  
85 described in two kindreds with truncating variants [3], and subsequently in several  
86 other families [4-12]. In addition to CHDs, *NOTCH1* mutations have been associated  
87 with Adams-Oliver syndrome, and certain types of cancers [14,15].

88

89 Predicted loss of function (pLOF) variants, e.g. frameshift, nonsense, and splice site  
90 variants, in *NOTCH1* have been reproducibly associated with LVOTO defects in  
91 multiple studies, and several missense variants have been reported in persons with  
92 LVOTO (Fig 1) [3-12]. Previous surveys of LVOTO in both simplex and multiplex  
93 families, observed pathogenic or likely pathogenic *NOTCH1* variants in 1-18% of  
94 families [5,8,11].

95

96 Both the initial description of *NOTCH1* in LVOTO and subsequent reports include

97 affected members with CHDs other than LVOTO defects including ventricular septal  
98 defects and Tetralogy of Fallot (TOF) [3, 11-12]. Additionally, study design has  
99 varied among previous analyses rendering estimation of risk and comparisons  
100 between studies difficult. Accordingly, while it is clear that pLOF *NOTCH1* variants  
101 are associated with LVOTO defects, the role of missense variants and therefore the  
102 overall attributable risk of *NOTCH1* variants to LVOTO defects remains unclear.

103

104 Here, we describe the presence of pLOF and missense variants in *NOTCH1* in a  
105 cohort of 49 simplex cases with HLHS. In addition, we use a large population-based  
106 study to assess the risk for LVOTO related heart defects conferred by variants in  
107 *NOTCH1* to identify two rare intronic risk variants.

108

## 109 Results

### 110 Exome Sequencing Reveals Likely Pathogenic Variants and Variants of

### 111 Unclear Significance

112 A total of 11 of the 49 probands (22%) had seven protein-altering *NOTCH1* variants,  
 113 each with a MAF of < 0.05. Three pLOF variants met criteria for pathogenicity (Table  
 114 1 and Fig 3). A novel (i.e., absent from all databases) *de novo* truncating variant  
 115 c.1077C>A (p.Cys359\*) with a CADD score of 37 was found in a single HLHS  
 116 proband. A truncating variant c.1650\_1651insT (p.Tyr550\*), with a CADD score of  
 117 35, was found in a proband with HLHS and CoA and her unaffected parent.  
 118 p.Tyr550\* had been reported previously in a family with Adams-Oliver syndrome  
 119 (AOS) [20]. A novel splicing variant, c.431-1G>A, with a CADD score of 26 was  
 120 found in a simplex family with HLHS. This variant was inherited from their father from  
 121 whom a DNA sample was unavailable.

122 Table 1. Non-synonymous *NOTCH1* variants identified in 49 probands with HLHS

| Diagnosis                     | Chr | Position  | Ref | Alt | dbSNP      | DNA change    | Protein change | Effect       | Allele frequency in gnomAD Finnish | CADD score | Inherited          |
|-------------------------------|-----|-----------|-----|-----|------------|---------------|----------------|--------------|------------------------------------|------------|--------------------|
| HLHS                          | 9   | 139413065 | G   | T   | N/A        | 1077C>A       | Cys359*        | Stopgain SNV | 0                                  | 38,0       | No                 |
| HLHS, CoA                     | 9   | 139410452 | G   | GT  | N/A        | 1650_1651insA | Y550_T551*     | Stopgain SNV | 0                                  | 35,0       | Yes                |
| HLHS                          | 9   | 139404414 | C   | T   | N/A        | c.2741-1G>A   |                | Splicing     | 0                                  | 26,0       | Yes                |
| 5 HLHS, 1 BAV*                | 9   | 139401233 | C   | T   | rs61751543 | 3836G>A       | Arg1279His     | ns SNV       | 0,02097                            | 16,2       | Yes 2/ Not known 3 |
| HLHS                          | 9   | 139401216 | C   | T   | N/A        | 3853G>A       | Val1285Met     | ns SNV       | 0                                  | 29,8       | 29,8               |
| HLHS                          | 9   | 139391338 | C   | T   | rs61751489 | 6853G>A       | Val2285Ile     | ns SNV       | 0,00617                            | 0.5        | Not known          |
| HLHS, BAV, CoA, HAA, ASD, VSD | 9   | 139391013 | T   | C   | N/A        | 7178A>G       | Gln2393Arg     | ns SNV       | 0                                  | 10,1       | Not known          |

123 \* 6 affected

124 Among the four remaining *NOTCH1* variants, a missense variant c.3836G>A

125 (p.Arg1279His) was found in 5 HLHS probands and in one person with BAV who  
126 was a half-sister of a proband. p.Arg1279His has been found in both persons with  
127 LVOTO and in controls in three previous studies [6,7,9]. Another missense variant,  
128 c.6853G>A (p.Val2285Ile), was found in one child with HLHS and his unaffected  
129 parent. A novel missense variant, c.7178A>G (p.Gln2393Arg), was found in a  
130 proband with HLHS, BAV, CoA, HAA, ASD, VSD. Finally, a rare missense variant c.  
131 3853G>A (p.Val1285Met), was found in a singleton proband with HLHS.

### 132 **Rare intronic variants in *NOTCH1* are associated with risk for LVOTO in** 133 **European and non-European populations**

134 Given the uncertain of whether the four missense variants detected in the probands  
135 with HLHS were causal, we decided to test the association of common and rare  
136 coding and noncoding variants in *NOTCH1* with risk of LVOTO and related CHD  
137 phenotypes more broadly in UK Biobank, a large population-based study. We first  
138 developed a classification scheme to identify 396 cases with LVOTO in a highly  
139 specific manner. To determine the power for detecting associations with rare-  
140 variants, we performed simulations of the Firth's penalized regression. As BAV was  
141 included in our definition of LVOTO and may commonly remain undiagnosed in the  
142 population at a significant rate, our simulations included misspecification of cases as  
143 controls. Power was largely dependent on the minor allele frequency, with  
144 misspecification of cases playing a negligible role in power at all simulated rates of  
145 misspecification of cases (S1 Fig). For the combined hybrid-LVOTO phenotype (n=  
146 271) the power to detect a genetic association with even low-risk variants of OR 2 or  
147 greater was nearly 100% at a minor allele frequency of 0.001, and at a minor allele  
148 frequency of 0.0001 nearly 80% to detect variants conferring a risk of 12.9 or higher

149 (S1 Fig). These simulations provide evidence of adequate power to detect genetic  
150 associations for CHD phenotypes related to *NOTCH1* even in the presence of  
151 unrecognized cases within a large control population.

152 We identified 400 non-coding or coding (missense and synonymous) variants in  
153 *NOTCH1* and no pLOF variants (S1 Table) available for analysis imputed with high  
154 quality. Among these 400 variants, none of the coding variants met our pre-specified  
155 threshold for locus wide significance. Two of the four non-synonymous variants we  
156 observed Finnish cohort (Val2285Ile and Arg1279His) were present in the UK  
157 biobank cohort but were not significantly associated with CHD.

158 Associations the hybrid LVOTO phenotype with two rare intronic variants in *NOTCH1*  
159 (g.chr9:139427582C>T, Odds Ratio 16.9, p=3.12e-6 and g.chr9:139435649C>T,  
160 Odds Ratio 19.6, p = 2.44e-6) met the locus-wide threshold for significance (Fig 4).  
161 As these two intronic variants appear at similar frequencies within non-European  
162 populations in the gnomAD database of population level genomic variation, we  
163 repeated analysis limited to the 68,952 individuals of non-European and mixed  
164 ancestry within the UK Biobank. The association with risk for LVOTO identified was  
165 of the same direction and similar magnitude (g.chr9:139427582C>T, Odds Ratio  
166 12.3, p=0.019 and g.chr9:139435649C>T, Odds Ratio 13.9, p = 0.014) (Fig 4 and  
167 Fig 5).

## 168 **Discussion**

169 We detected a likely pathogenic/pLOF mutation in *NOTCH1* in 6% of individuals with  
170 HLHS in a Finnish cohort [21]. These variants included a splicing variant and two  
171 truncating variants. These findings suggest that pLOF variants in *NOTCH1* may be  
172 sufficiently prevalent in LVOTO defects to warrant genetic testing. An additional 16%



173 of HLHS probands in this cohort had missense variants of unknown significance.  
174 Further study of missense *NOTCH1* variants in a large population-based study of  
175 LVOTO defects did not reveal any significant association between missense variants  
176 and risk for less severe LVOTO-related defects. In the population-based study,  
177 neither common nor rare missense variants in *NOTCH1* were significantly  
178 associated with LVOTO defects. Notably, no pLOF variants were identified in the  
179 population-based study cohort, suggesting that such variants are very rare in  
180 putatively healthy population controls.

181 Two rare intronic variants displayed strong association with risk for LVOTO defects  
182 in both European and non-European/mixed populations. These two variants appear  
183 to exist in similar frequencies in European (MAF=0.00074), Ashkenazi Jewish  
184 (MAF=0.0078), and African (MAF=0.0003) populations, and are separated by 8,068  
185 base pairs and display strong linkage disequilibrium ( $r^2 = 0.949$ ) suggesting the  
186 associations with LVOTO are not unique or independent. The two variants exist  
187 within the large intron between the second and third exons of *NOTCH1*, and are not  
188 located with sufficient proximity to exert a functional effect on canonical splicing of  
189 the transcripts for *NOTCH1* or nearby microRNAs (*MIR4673* and *MIR4674*) and  
190 additionally do not appear to be strongly conserved through evolution. Thus a direct  
191 effect of the two variants upon the protein sequence or structure of *NOTCH1* is not  
192 clear and will require an experimental approach to determine function which may be  
193 related to transcription or epigenetic regulation.

194 The absence of a significant association of missense variants in *NOTCH1* with  
195 LVOTO-related phenotypes in UK Biobank must be interpreted with attention to the  
196 characteristics of the study population. Long-term survival of patients with HLHS was

197 achieved by surgical innovations during 1980's, and thus there were no patients with  
198 HLHS within the UK Biobank cohort, which consists of middle-aged to elderly  
199 individuals from the general population. The small fraction of individuals classified  
200 with LVOTO is lower than previous population estimates of BAV (the most common  
201 type of LVOTO) suggesting some ascertainment errors due to the use of  
202 phenotyping from medical records, perhaps in a combination with a healthy cohort  
203 effect (the individuals in UK Biobank being healthier than the general population).  
204 Moreover, as pathogenic *NOTCH1* mutations have been found more frequently in  
205 pediatric study cohorts than in adult cohorts, it has been speculated that *NOTCH1*  
206 mutations are more often found in severe disease [11]. Cardiac MRI data are  
207 currently available for a small fraction of individuals within the UKBiobank. Of the  
208 LVOTO cases classified by the specification schema, two individuals identified had  
209 available MRI imaging, and both were positively identified as having bicuspid aortic  
210 valve. Our algorithmic approach to classification of individuals with CHD relying upon  
211 clinical and self-reported data requires additional validation, but the overall approach  
212 may offer insight into rare alleles conferring risk for disease that has been obscured  
213 by the underlying genetic architecture of complex diseases in diverse human  
214 populations [22].

215 Two of our 49 probands had novel truncating variants, and truncating variants in  
216 *NOTCH1* have been reproducibly associated with LVOTO defects. A total of 14 of  
217 the 138,632 gnomAD subjects have truncating *NOTCH1* variants and the probability  
218 of loss of function variant intolerance (pLI) is estimated to be 1.0. Previously both *de*  
219 *novo* [10] and familial [11] splice site variants have been reported in LVOTO  
220 subjects. The splice site variant 431-1G>A found in an HLHS proband in this study  
221 was also found in the asymptomatic father indicating reduced penetrance, which is in

222 accordance with a previous study where familial splicing variants had 87%  
223 penetrance [11]. According to the Human Splicing Finder, the 431-1G>A variant  
224 alters the WT acceptor site and is likely to affect splicing [25]. Only 5 of 138,632  
225 individuals included in gnomAD have splice site variants in *NOTCH1*, indicating  
226 these are poorly tolerated variants.

227 The truncating p.Tyr550\* variant found in one of the HLHS probands studied herein  
228 has been previously reported in a kindred with four affected members with AOS with  
229 variable expression of congenital limb defects and scalp cutis aplasia [20]. Of these  
230 four AO individuals, one had undergone cardiac evaluation by echocardiogram  
231 showing AS and aortic regurgitation. Functional analysis associated the variant with  
232 reduced expression of *NOTCH1*, *HEY1* and *HES1* in peripheral blood as measured  
233 by RT-PCR indicating that the truncated protein is likely to be subject to nonsense-  
234 mediated decay reducing the downstream *NOTCH1* signaling. Notably, two family  
235 members with this variant did not have AOS; however, one of them had an  
236 unexplained heart murmur, and the other had aortic regurgitation, and a family  
237 member with unknown genetic variant status died of an unspecified CHD.

238 Based on our analyses in the UK Biobank, which failed to detect a significant  
239 association of missense variants in *NOTCH1* with LVOTO-related phenotypes, we  
240 think the four non-synonymous variants are not able to cause disease in isolation.  
241 However, the inheritance pattern of CHD is in many cases complex, and the  
242 contribution of these variants to disease together with other predisposing  
243 environmental or genetic factors cannot be determined. The Arg1279His variant  
244 (rs61751543) is particularly interesting, as it has been seen more frequently in cases  
245 vs. controls in three previous LVOTO cohorts[6,7,9]. In this study it is seen in 5/49

246 (10%) HLHS probands compared to 2% of the Finnish gnomAD population. The  
247 variant has a CADD score of 16.23, which could be interpreted to suggest potential  
248 pathogenicity *in silico*. Notably, the Finnish gnomAD population has not been  
249 phenotyped for CHD, and likely contains some sporadic individuals with  
250 undiagnosed BAV, which is relatively common. However, recent analyses  
251 incorporating variant penetrance and incomplete ascertainment of control  
252 populations [26] suggest that a conservative view must be taken when assigning  
253 disease risk for individual variants. Additionally, in functional analysis the Arg1279His  
254 variant does not diminish *JAG1* induced *NOTCH1* signaling [6]. Functional studies  
255 on the role of low-frequency variants overrepresented in CHD in patient-derived  
256 induced pluripotent stem cells would be fruitful in assessing their pathogenic  
257 potential.

258 The discovery of the same truncating variant in a family with HLHS and a family with  
259 AOS with minor or no detectable cardiac phenotype is illustrative of variable  
260 phenotypic expressivity. Different mutations in the same gene causing different  
261 phenotypes in different families may be due to the presence of modifying mutations  
262 within a network of interacting proteins [27], stochastic differences in transcriptional  
263 dynamics or cardiovascular development, poorly characterized aspects of epigenetic  
264 inheritance, or environmental factors. Given that epistatic effects between genetic  
265 variants are difficult to detect even in large genetic studies [28], discovery of  
266 modifying factors (genetic, environmental, epigenetic, or otherwise) may depend on  
267 hypothesis-driven experimental approaches [29].

268 In conclusion, in our study of 49 HLHS individuals, three (6%) had loss of function  
269 variants, which are likely causative for the congenital heart defects. In addition, five

270 affected individuals (10%) and one affected relative displayed a low frequency  
271 variant p.Arg1279His present in 2% of the general population which does not appear  
272 to be associated with risk for disease in a large-scale association study of less  
273 severe phenotypes. Two rare intronic variants displayed strong association with risk  
274 for LVOTO defects. However, due to their deep intronic location, the direct functional  
275 effect of the two variants upon *NOTCH1* is not clear. Our finding of pathogenic  
276 *NOTCH1* variants in 6% of the study subjects is similar in prevalence to single genes  
277 causing Long QT syndrome and hypertrophic cardiomyopathy, cardiac conditions for  
278 which genetic testing is routine. Thus our data are supportive of the use of clinical  
279 testing for *NOTCH1* variant screening patients with HLHS and other LVOTO.

280 Rare, highly penetrant LOF variants clearly increase risk for nonsyndromic  
281 CHD[30,31] in a small percentage of the general population while the role of  
282 missense variants remains unclear. Genetic risk factors that explain the bulk of  
283 syndromic and non-syndromic CHD remain to be discovered. Moreover, the role of  
284 environmental modifiers and interactions among loci remain largely unexplored.  
285 Access to large cohorts of robustly phenotyped families with CHD and the availability  
286 of comparative genomic data sets from large reference populations will enable both  
287 careful assessment of the pathogenicity of rare variants and facilitate identification of  
288 novel variants / genes associated with CHD. Functional studies of the pathogenic  
289 potential of such variants in patient-derived induced pluripotent stem cells may  
290 confirm the pathogenicity of these variants and may serve to elucidate mechanisms  
291 behind reduced penetrance. For genes where causality for cardiac malformations is  
292 well established, our findings may suggest an opportunity to quantify risk conferred  
293 by inherited alleles to increase the known fraction of genetic attributable risk for  
294 CHD.

## 295 **Methods**

### 296 **Exome Sequencing in Finnish Probands and Relatives**

297 We recruited a cohort of 49 patients with HLHS from Helsinki University Children's  
298 Hospital. Exome sequencing was performed by the University of Washington Center  
299 for Mendelian Genomics Seattle, USA, on DNA samples collected from 37 probands,  
300 7 trios (5 with unaffected or unknown parental phenotypes, and 2 with one affected  
301 parent), and 5 probands with a family history of LVOTO defects. In these latter  
302 cases, we sequenced the parents, siblings and other affected family members (Fig  
303 2a-c). All persons sequenced were of self-reported Finnish ancestry.

304 In brief, library capture was performed with Roche/Nimblegen SeqCap EZ v2.0, with  
305 75-base pair paired-end sequencing on the HiSeq2500/4000 instrument (RTA  
306 1.18.34/RTA 2.5.2). BAM files were aligned to a human reference (hg19hs37d5)  
307 using BWA-MEM (Burrows-Wheeler Aligner; v0.7.10) [32]. Read-pairs not mapping  
308 within  $\pm 2$  standard deviations of the average library size ( $\sim 150 \pm 15$  bp for exomes)  
309 were removed. RTG-core version 3.3.2 was applied to the raw exome sequence  
310 data for mapping, pedigree-aware variant calling, and genotype filtration (Real Time  
311 Genomics Inc., Hamilton, New Zealand) [33].

312 We analyzed all non-synonymous *NOTCH1* variants found with an allele frequency  
313 of  $<0.05$  in the Genome Aggregation Database (gnomAD) [34]. In addition, we  
314 checked the occurrence and frequency of the candidate variants in the Sequencing  
315 Initiative Suomi (SISu) [35] database. Annotation was performed with the internally  
316 developed STANNOVAR tool [36]. Combined Annotation Dependent Depletion  
317 (CADD) scores were used to estimate the pathogenicity of the candidate variants.

318 CADD is a tool for scoring the deleteriousness of single nucleotide variants as well  
319 as insertion/deletions variants in the human genome. The CADD score integrates  
320 multiple annotations into one metric by contrasting variants that survived natural  
321 selection with simulated mutations [37]. Likely pathogenic variants were confirmed  
322 with Sanger sequencing of PCR amplicons in all available family members. The  
323 following PCR primers were used: NOTCH1 p.Tyr550Ter: Forward-  
324 GCACACTCGTTGATGTCCTC, Reverse-AGAACTGTCTCTCCTCCCCT; NOTCH1  
325 c.431-1G>A: Forward-TACTCAGGATTGGGGCTGAG, Reverse-  
326 GAAGGGCCATAGTGCTGTTG; NOTCH1 p.Cys359Ter: Forward-  
327 GTTGTAACGACGGCCAGTGTGAGGTCACACAGCTCAGG, Reverse-  
328 TCACACAGGAAACAGCTATGAGTACCGAGGATGTGGACGAG.

329 The guidelines of the Declaration of Helsinki were followed and the study was  
330 approved by the Ethics Board of Helsinki and Uusimaa Hospital District. Written  
331 informed consent was obtained from each participant over 6 years of age, and from  
332 both parents of each minor participant.

### 333 **Population Studies in the UK Biobank**

334 **Classification of Left Ventricular Outflow Tract Disease from Biobank Data.** A  
335 classification algorithm (S2 Fig) was developed for defining case and control  
336 subjects using diagnostic codes from the International Classification of Diseases  
337 versions 9 and 10, the OPCS Classification of Interventions and Procedures version  
338 4, and from self-reported medical history data collected in a questionnaire and  
339 codified by a trained nurse for the UK Biobank study (all codes listed in S3 Table).  
340 The LVOTO phenotype was defined as comprising the following individual  
341 phenotypes of congenital etiology: aortic stenosis, subaortic stenosis, aortic

342 insufficiency, aortic coarctation, aortic atresia, congenital aneurysm of the aorta, and  
343 hypoplastic left heart syndrome. Since an undiagnosed bicuspid aortic valve may  
344 manifest with outflow obstruction (i.e. aortic stenosis and/or insufficiency) later in life,  
345 the classification algorithm was designed to identify patients with bicuspid aortic  
346 valves who otherwise were not codified as having a congenital heart defect, a  
347 process not previously defined in the literature. Patients with aortic valve disease  
348 with unspecified etiology or who had had an aortic valve replacement were excluded  
349 from cases and reclassified as controls if they met criteria for non-congenital  
350 etiologies of valve disease (i.e. rheumatic heart disease, endocarditis, etc.) (S3  
351 Table). Furthermore, of the remaining cases, if the age at diagnosis was >45 for  
352 aortic valve disease and age at surgery was >50 for valve replacement, then the  
353 patient was excluded to reduce the chance of false positives due to age-related  
354 degenerative aortic valve disease. False positive rates were predicted using data on  
355 the frequency of bicuspid aortic valves by decade of life published in 2011 by  
356 Roberts and Ko [38]. Lastly, control subjects meeting criteria for diagnoses that are  
357 associated with syndromic or sporadic congenital heart disease (i.e. endocarditis,  
358 thoracic aortic aneurysm, aortic root dilation) but otherwise unable to meet inclusion  
359 criteria were excluded to minimize the chance of false negatives in the control  
360 population (S3 Table).

361 **Association Testing for *NOTCH1* Variants.** We performed a primary genetic  
362 association study for LVOTO and related phenotypes in 271 cases and 333,571  
363 controls of European ancestry included in the recent release of imputed genetic data  
364 from the UK Biobank [39,40]. From the dataset of imputed variants, we analyzed 400  
365 common and rare variants in *NOTCH1*. Summary statistics from the association  
366 tests of European ancestry participants can be found in S4 Table.



367 Statistical testing was performed by standard methodology using PLINK version 2.0  
368 using the hybrid logistic regression with Firth's penalized regression fallback for non-  
369 converging models with PLINK's `--glm firth-fallback` option) [41,42]. and included 10  
370 principal components related to ancestry as continuous covariates and two binary  
371 covariates related to genotyping batch. From the imputed dataset, we included 400  
372 exonic and intronic variants with 30 or more alleles in the population that had missing  
373 rates of 5% or lower and high quality imputation (95% or greater individuals for which  
374 the maximum genotype probability was greater than a threshold of 0.9), and which  
375 also displayed an empirical-theoretical variance ratio (MaCH's  $r^2$ ) >0.8. For analysis  
376 of any single variant, individuals with missing calls were excluded. Primary testing  
377 was performed in 271 cases and 333,571 controls of white British origin.  
378 Confirmatory testing was performed in 51 cases and 68,952 controls of non-  
379 European or mixed ancestry.

380 We performed a single analysis of the LVOTO hybrid, and estimates of risk ratios  
381 and confidence intervals for individual variants were obtained including the same  
382 covariates, as mentioned above. Significance thresholds were predetermined; we  
383 report a locus-wide 0.000125 (0.05 / 400 analyzed variants in *NOTCH1*) significance  
384 threshold.

385 Power calculations were performed for unbalanced case control study design  
386 employing the *logistf* package implementation of the Firth's penalized logistic  
387 regression in the R language for statistical computing [42]. Firth's regression  
388 implementation in the *logistf* package is used by PLINK 2 for the association tests  
389 when conventional models fail to converge. Simulations were conducted in 1000  
390 replicates holding constant a variant with a minor allele frequency of 0.1, 0.05, 0.01,

391 0.001, or 0.0001 and a control population size of 333,571 individuals, with variation  
392 of the genotype relative risk (GRR) at 2, 4, 8, 16, and 32. For simplicity the  
393 simulations employed an additive model of risk, for which the  $GRR = f_1 / f_0$  where  
394  $f_0$  and  $f_1$  represent the likelihood of being affected with LVOTO for individuals with 0  
395 or 1 risk alleles respectively. Additionally, as our classification schema for cases was  
396 weighted towards specificity (described above) and the high likelihood of  
397 misspecification of undiagnosed BAV within the control population, we simulated  
398 mis-specification of controls at a rate of 0.01% 0.1%, and 1%. Estimation of power  
399 for specific risk and allele frequencies was calculated using local polynomial  
400 regression from the simulated datasets.

#### 401 **Acknowledgements**

402 Sequencing was provided by the University of Washington Center for Mendelian  
403 Genomics (UW-CMG) and was funded by the National Human Genome Research  
404 Institute and the National Heart, Lung and Blood Institute grant HG006493 to Drs.  
405 Deborah Nickerson, Michael Bamshad, and Suzanne Leal.

406

407 **REFERENCES**

- 408 1. Reller MD, Strickland MJ, Riehle-Colarusso T, Mahle WT, Correa A.  
409 Prevalence of congenital heart defects in metropolitan Atlanta, 1998-2005. J  
410 Pediatr. 2008;153(6):807-813.
- 411 2. Øyen N, Poulsen G, Boyd HA, Wohlfahrt J, Jensen PK, Melbye M.  
412 Recurrence of congenital heart defects in families. Circulation.  
413 2009;120(4):295-301.
- 414 3. Garg V, Muth AN, Ransom JF, Schluterman MK, Barnes R, King IN, et al.  
415 Mutations in NOTCH1 cause aortic valve disease. Nature. 2005;437:270-4.
- 416 4. Mohamed SA, Aherrahrou Z, Liptau H, Erasmi AW, Hagemann C, Wrobel  
417 S, et al. Novel missense mutations (p.T596M and p.P1797H) in NOTCH1 in  
418 patients with bicuspid aortic valve. Biochem Biophys Res Commun.  
419 2006;345(4):1460-5
- 420 5. McKellar SH, Tester DJ, Yagubyan M, Majumdar R, Ackerman MJ, Sundt TM.  
421 Novel NOTCH1 mutations in patients with bicuspid aortic valve disease and  
422 thoracic aortic aneurysms. J Thorac Cardiovasc Surg. 2007;134:290–296.
- 423 6. McBride KL, Riley MF, Zender GA, Fitzgerald-Butt SM, Towbin JA, Belmont  
424 JW, et.al. NOTCH1 mutations in individuals with left ventricular outflow tract  
425 malformations reduce ligand-induced signaling. Hum Mol Genet.  
426 2008;17:2886–2893.
- 427 7. Iascone M, Ciccone R, Galletti L, Marchetti D, Seddio F, Lincusso AR, et al.  
428 Identification of *de novo* mutations and rare variants in hypoplastic left heart  
429 syndrome. Clin Genet. 2012;81:542–554.
- 430 8. Foffa I, Ait Ali L, Panesi P, Mariani M, Festa P, Botto N, et al. Sequencing of  
431 NOTCH1, GATA5, TGFBR1 and TGFBR2 genes in familial cases of bicuspid

- 432 aortic valve. *BMC Med Genet.* 2013;Apr11;14:44
- 433 9. Freylikhman O, Tatarinova T, Smolina N, Zhuk S, Klyushina A, Kiselev A, et  
434 al. Variants in the NOTCH1 gene in patients with aortic coarctation. *Congenit*  
435 *Heart Dis.* 2014;Sep-Oct;9(5):391-6.
- 436 10. Theis JL, Hrstka S, Evans JM, O'Byrne MM, de Andrade M, O'Leary PW, et al.  
437 Compound heterozygous NOTCH1 mutations underlie impaired cardiogenesis  
438 in a patient with hypoplastic left heart syndrome. *Hum Genet.* 2015;134:1003–  
439 1011
- 440 11. Kerstjens-Frederikse WS, van de Laar I, Vos YJ. Cardiovascular  
441 malformations caused by NOTCH1 mutations do not keep left: data on 428  
442 probands with left-sided CHD and their families. *Genet Med.* 2016; 18(9):914-  
443 23.
- 444 12. Preuss C, Capredon M, Wunnemann F, Chetaille P, Prince A, Godard B, et al.  
445 Family Based Whole Exome Sequencing Reveals the Multifaceted Role of  
446 Notch Signaling in Congenital Heart Disease. *PLoS Genet.* 2016;12(10):  
447 e1006335.
- 448 13. Artavanis-Tsakonas S, Rand MD, Lake RJ. Notch signaling: cell fate control  
449 and signal integration in development. *Science.* 1999;284: 770–6
- 450 14. Stittrich AB, Lehman A, Bodian DL, Ashworth J, Zong Z, Li H et al. Mutations  
451 in NOTCH1 cause Adams-Oliver syndrome. *Am J Hum*  
452 *Genet.* 2014;95(3):275-84.
- 453 15. Radtke F. and Raj K. The role of Notch in tumorigenesis: oncogene or tumour  
454 suppressor? *Nat Rev Cancer.* 2003;Sep3:756–767. □ □
- 455 16. Yang B, Zhou W, Jiao J, Nielsen JB, Mathis MR, Heydarpour M, et al. Protein-  
456 altering and regulatory genetic variants near GATA4 implicated in bicuspid

- 457 aortic valve. *Nat Commun.* 2017;May25:8:15481.
- 458 17. Tan HL, Glen E, Töpf A, Hall D, O'Sullivan JJ, Sneddon L, et al.  
459 Nonsynonymous variants in the SMAD6 gene predispose to congenital  
460 cardiovascular malformation. *Hum Mutat.* 2012;33(4):720-7.
- 461 18. Shi LM, Tao JW, Qiu XB, Wang J, Yuan F, Xu Let al. GATA5 loss-of-function  
462 mutations associated with congenital bicuspid aortic valve. *Int J Mol Med.*  
463 2014; 33(5):1219-26.
- 464 19. Qu XK, Qiu XB, Yuan F, Wang J, Zhao CM, Liu XY et al. A novel NKX2.5  
465 loss-of-function mutation associated with congenital bicuspid aortic valve. *Am*  
466 *J Cardiol.* 2014;114(12):1891-5.
- 467 20. Southgate L, Sukalo M, Karountzos AS, Taylor EJ, Collinson CS, Ruddy D, et  
468 al. Haploinsufficiency of the NOTCH1 Receptor as a Cause of Adams-Oliver  
469 Syndrome With Variable Cardiac Anomalies. *Circ Cardiovasc Genet.*  
470 2015;Aug;8(4):572-81
- 471 21. Richards S, Aziz N, Bale S, Bick D, Das S, Gastier-Foster J et al. Standards  
472 and Guidelines for the Interpretation of Sequence Variants: A Joint  
473 Consensus Recommendation of the American College of Medical Genetics  
474 and Genomics and the Association for Molecular Pathology. *Genet Med.*  
475 2015;17(5):405-424.
- 476 22. Uricchio LH, Zaitlen NA, Ye CJ, Witte JS, Hernandez RD. Selection and  
477 explosive growth alter genetic architecture and hamper the detection of causal  
478 rare variants. *Genome Res.* 2016;26(7):863-73
- 479 23. Bonachea EM, Chang SW, Zender G, LaHaye S, Fitzgerald-Butt S, McBride  
480 KL, et al. Rare GATA5 sequence variants identified in individuals with bicuspid  
481 aortic valve, *Pediatr Res.* 2014;Aug;76(2):211-6.

- 482 24. Padang R, Bagnall RD, Richmond DR, Bannon PG, Semsarian C. Rare non-  
483 synonymous variations in the transcriptional activation domains of GATA5 in  
484 bicuspid aortic valve disease. *J Mol Cell Cardiol.* 2012;Aug;53(2):277-81.
- 485 25. Desmet FO, Hamroun D, Lalande M, Collod-Bérout G, Claustres M, Bérout  
486 C. Human Splicing Finder: an online bioinformatics tool to predict splicing  
487 signals. *Nucleic Acids Res.* 2009;May;37(9):e67.
- 488 26. International Multiple Sclerosis Genetics Consortium. NR1H3 p.Arg415Gln Is  
489 Not Associated to Multiple Sclerosis Risk. *Neuron.* 2016;Oct19;92(2):333-335
- 490 27. Sahni N, Yi S, Taipale M, Fuxman Bass JI, Coulombe-Huntington J, Yang F,  
491 et al. Widespread macromolecular interaction perturbations in human genetic  
492 disorders. *Cell.* 2015;Apr23;161(3):647-60.
- 493 28. Wei W-H, Hemani G, and Haley S. Detecting epistasis in human complex  
494 traits. *Nat Rev Genet.* 2014;15(11):722-733.
- 495 29. Ang YS, Rivas RN, Ribeiro AJ, Srivas R, Rivera J, Stone NR et al. Disease  
496 Model of GATA4 Mutation Reveals Transcription Factor Cooperativity in  
497 Human Cardiogenesis. *Cell.* 2016;Dec15;167(7):1734-1749.e22.
- 498 30. Sifrim A, Hitz MP, Wilsdon A, Breckpot J, Turki SH, Thienpont B et al. Distinct  
499 genetic architectures for syndromic and nonsyndromic congenital heart  
500 defects identified by exome sequencing. *Nat Genet.* 2016;Sep;48(9):1060-5
- 501 31. Blue GM, Kirk EP, Giannoulatou E, Dunwoodie SL, Ho JW, Hilton DC, et al.  
502 Targeted next-generation sequencing identifies pathogenic variants in familial  
503 congenital heart disease. *J Am Coll Cardiol.* 2014;Dec16;64(23):2498-506.
- 504 32. Li H, Durbin R. Fast and accurate short read alignment with Burrows-Wheeler  
505 transform. *Bioinformatics.* 2009;Jul15;25(14):1754-60.
- 506 33. Reumers J, De Rijk P, Zhao H, Liekens A, Smeets D, Cleary J, et

- 507 al. Optimized filtering reduces the error rate in detecting genomic variants by  
508 short-read sequencing. *Nat Biotechnol.* 2011;30:61–68.
- 509 34. Exome Aggregation Consortium, Lek M, Karczewski KJ, Minikel EV, Samocha  
510 KE, Banks E, et al. Analysis of protein-coding genetic variation in 60,706  
511 humans. *bioRxiv* 030338; doi: <https://doi.org/10.1101/030338>.
- 512 35. Sequencing Initiative Suomi project (SISu), Institute for Molecular Medicine  
513 Finland (FIMM), University of Helsinki, Finland. <http://sisuproject.fi>. (SISu v4.1,  
514 accessed May 15th 2017).
- 515 36. Dewey FE, Grove ME, Priest JR, Waggott D, Batra P, Miller CL, et al.  
516 Sequence to Medical Phenotypes: A Framework for Interpretation of Human  
517 Whole Genome DNA Sequence Data. *PLoS Genet.* 2015;Oct  
518 8;11(10):e1005496.
- 519 37. Kircher M, Witten DM, Jain P, O'Roak BJ, Cooper GM, Shendure JA. A  
520 general framework for estimating the relative pathogenicity of human genetic  
521 variants. *Nat Genet.* 2014;46(3):310-5.
- 522 38. Roberts WC, Ko JM. Frequency by Decades of Unicuspid, Bicuspid, and  
523 Tricuspid Aortic Valves in Adults Having Isolated Aortic Valve Replacement  
524 for Aortic Stenosis, With or Without Associated Aortic Regurgitation.  
525 *Circulation.* 2005;111(7):920-925.
- 526 39. Sudlow C, Gallacher J, Allen N, Beral V, Burton P, Danesh J, et al. UK  
527 biobank: an open access resource for identifying the causes of a wide range  
528 of complex diseases of middle and old age. *PLoS Med.*  
529 2015;Mar31;12(3):e1001779.
- 530 40. Bycroft C, Freeman C, Petkova D, Band G, Elliott LT, Sharp K, et al. Genome-  
531 wide genetic data on~ 500,000 UK Biobank participants. *bioRxiv*.

532 2017:166298 doi: <https://doi.org/10.1101/166298>.

533 41. Chang CC, Chow CC, Tellier LCAM, Vattikuti S, Purcell SM, Lee JJ. Second-

534 generation PLINK: rising to the challenge of larger and richer datasets.

535 GigaScience, 2015;4:7.

536 42. Heinze G, Ploner M, Beyea J. Confidence intervals after multiple imputation:

537 combining profile likelihood information from logistic regressions. Stat Med.

538 2013;Dec20;32(29):5062-76.

539



540 Figure captions

541

542 Figure 1. Previously reported non- synonymous and pLOF *NOTCH1* mutations in

543 LVOTO subjects<sup>41,42</sup>.

544 Figure 2. Pedigrees of 5 trios with unaffected (a-c), unknown (d, e), and possibly

545 affected (f, g) parental phenotypes, and pedigrees of 6 families with more than one

546 affected member (h-m).

547 Figure 3. Non- synonymous and pLOF mutations in *NOTCH1* in the study population

548 presented in Mutation Mapper as a lollipop plot<sup>41,42</sup>.

549 Figure 4. Region plot for the association of *NOTCH1* variants with LVOTO.

550 Figure 5. Effect sizes of the associated *NOTCH1* variants in European and non-

551 European and mixed populations.

# NOTCH1

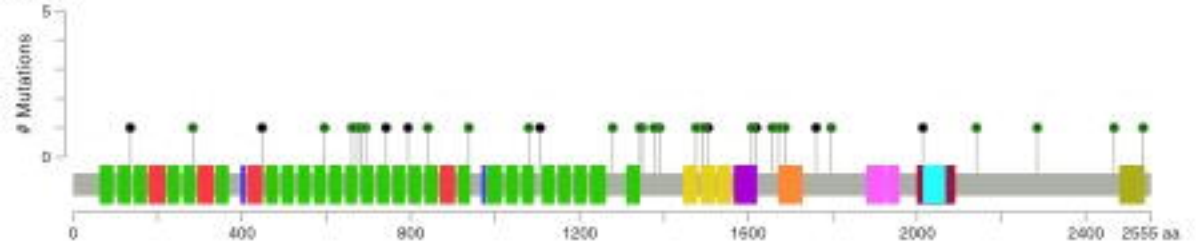

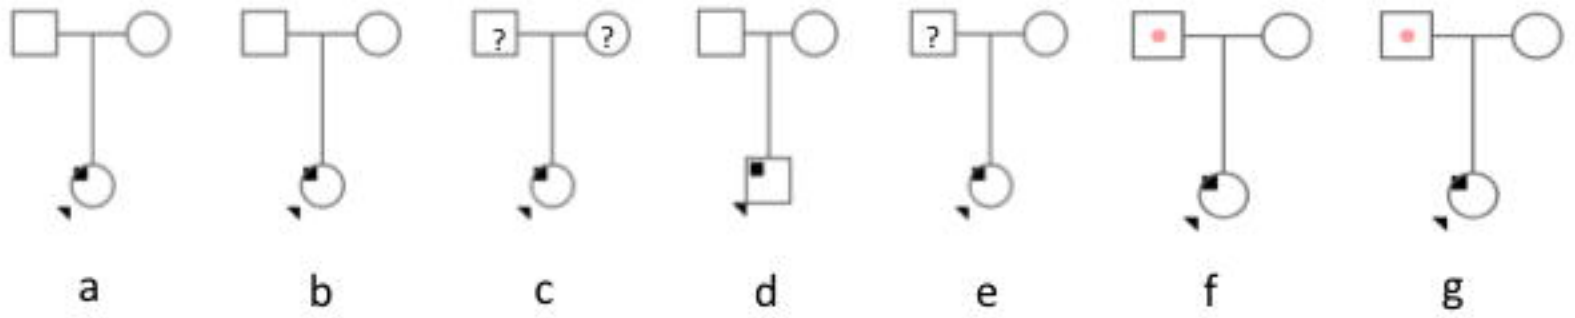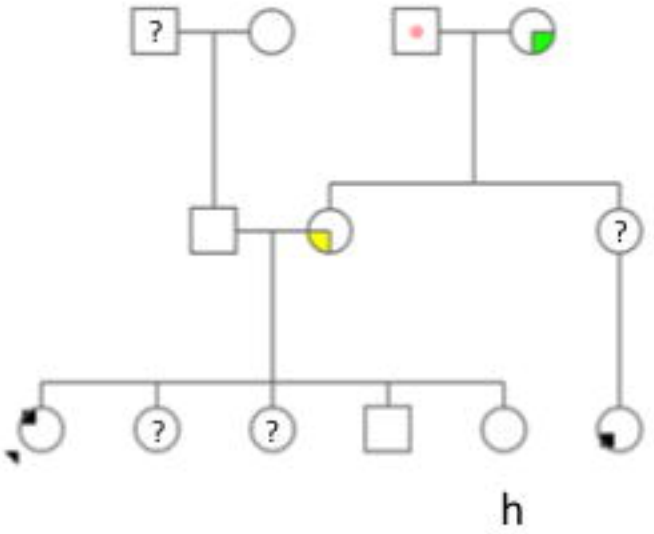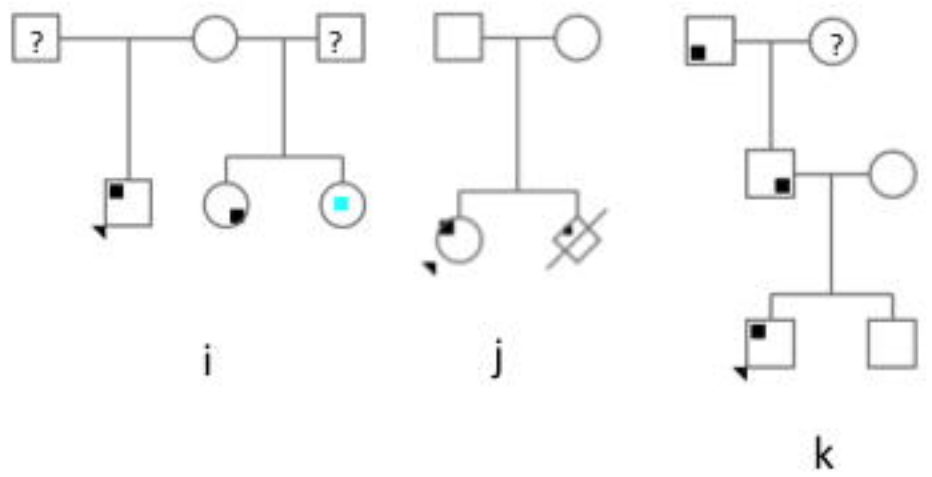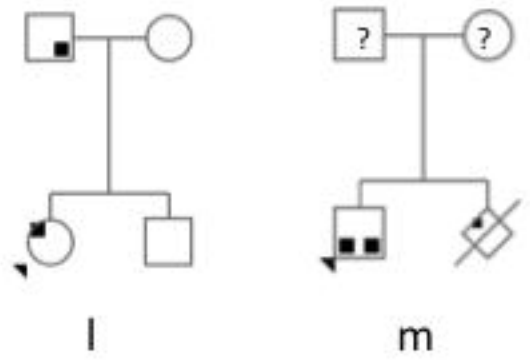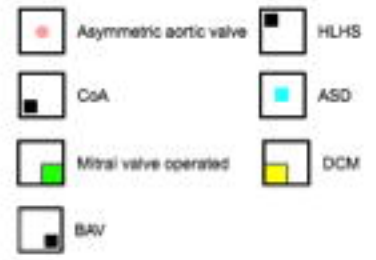

? = Unknown phenotype

# NOTCH1

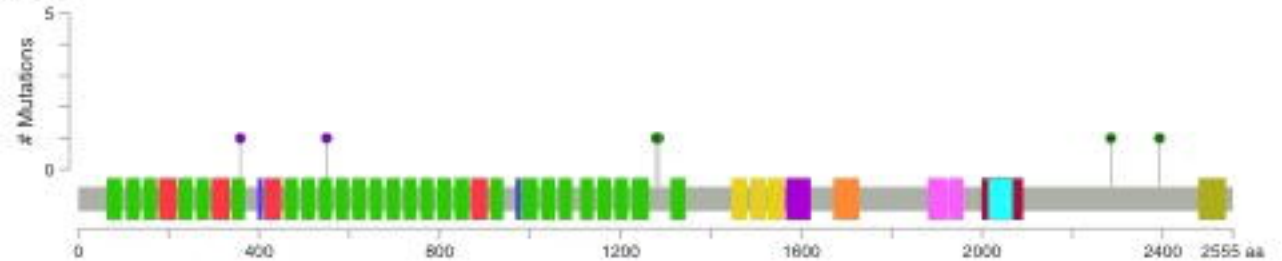

Plotted SNPs

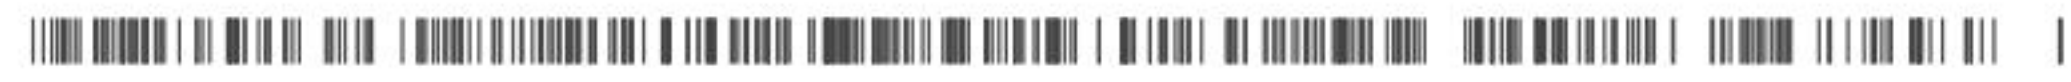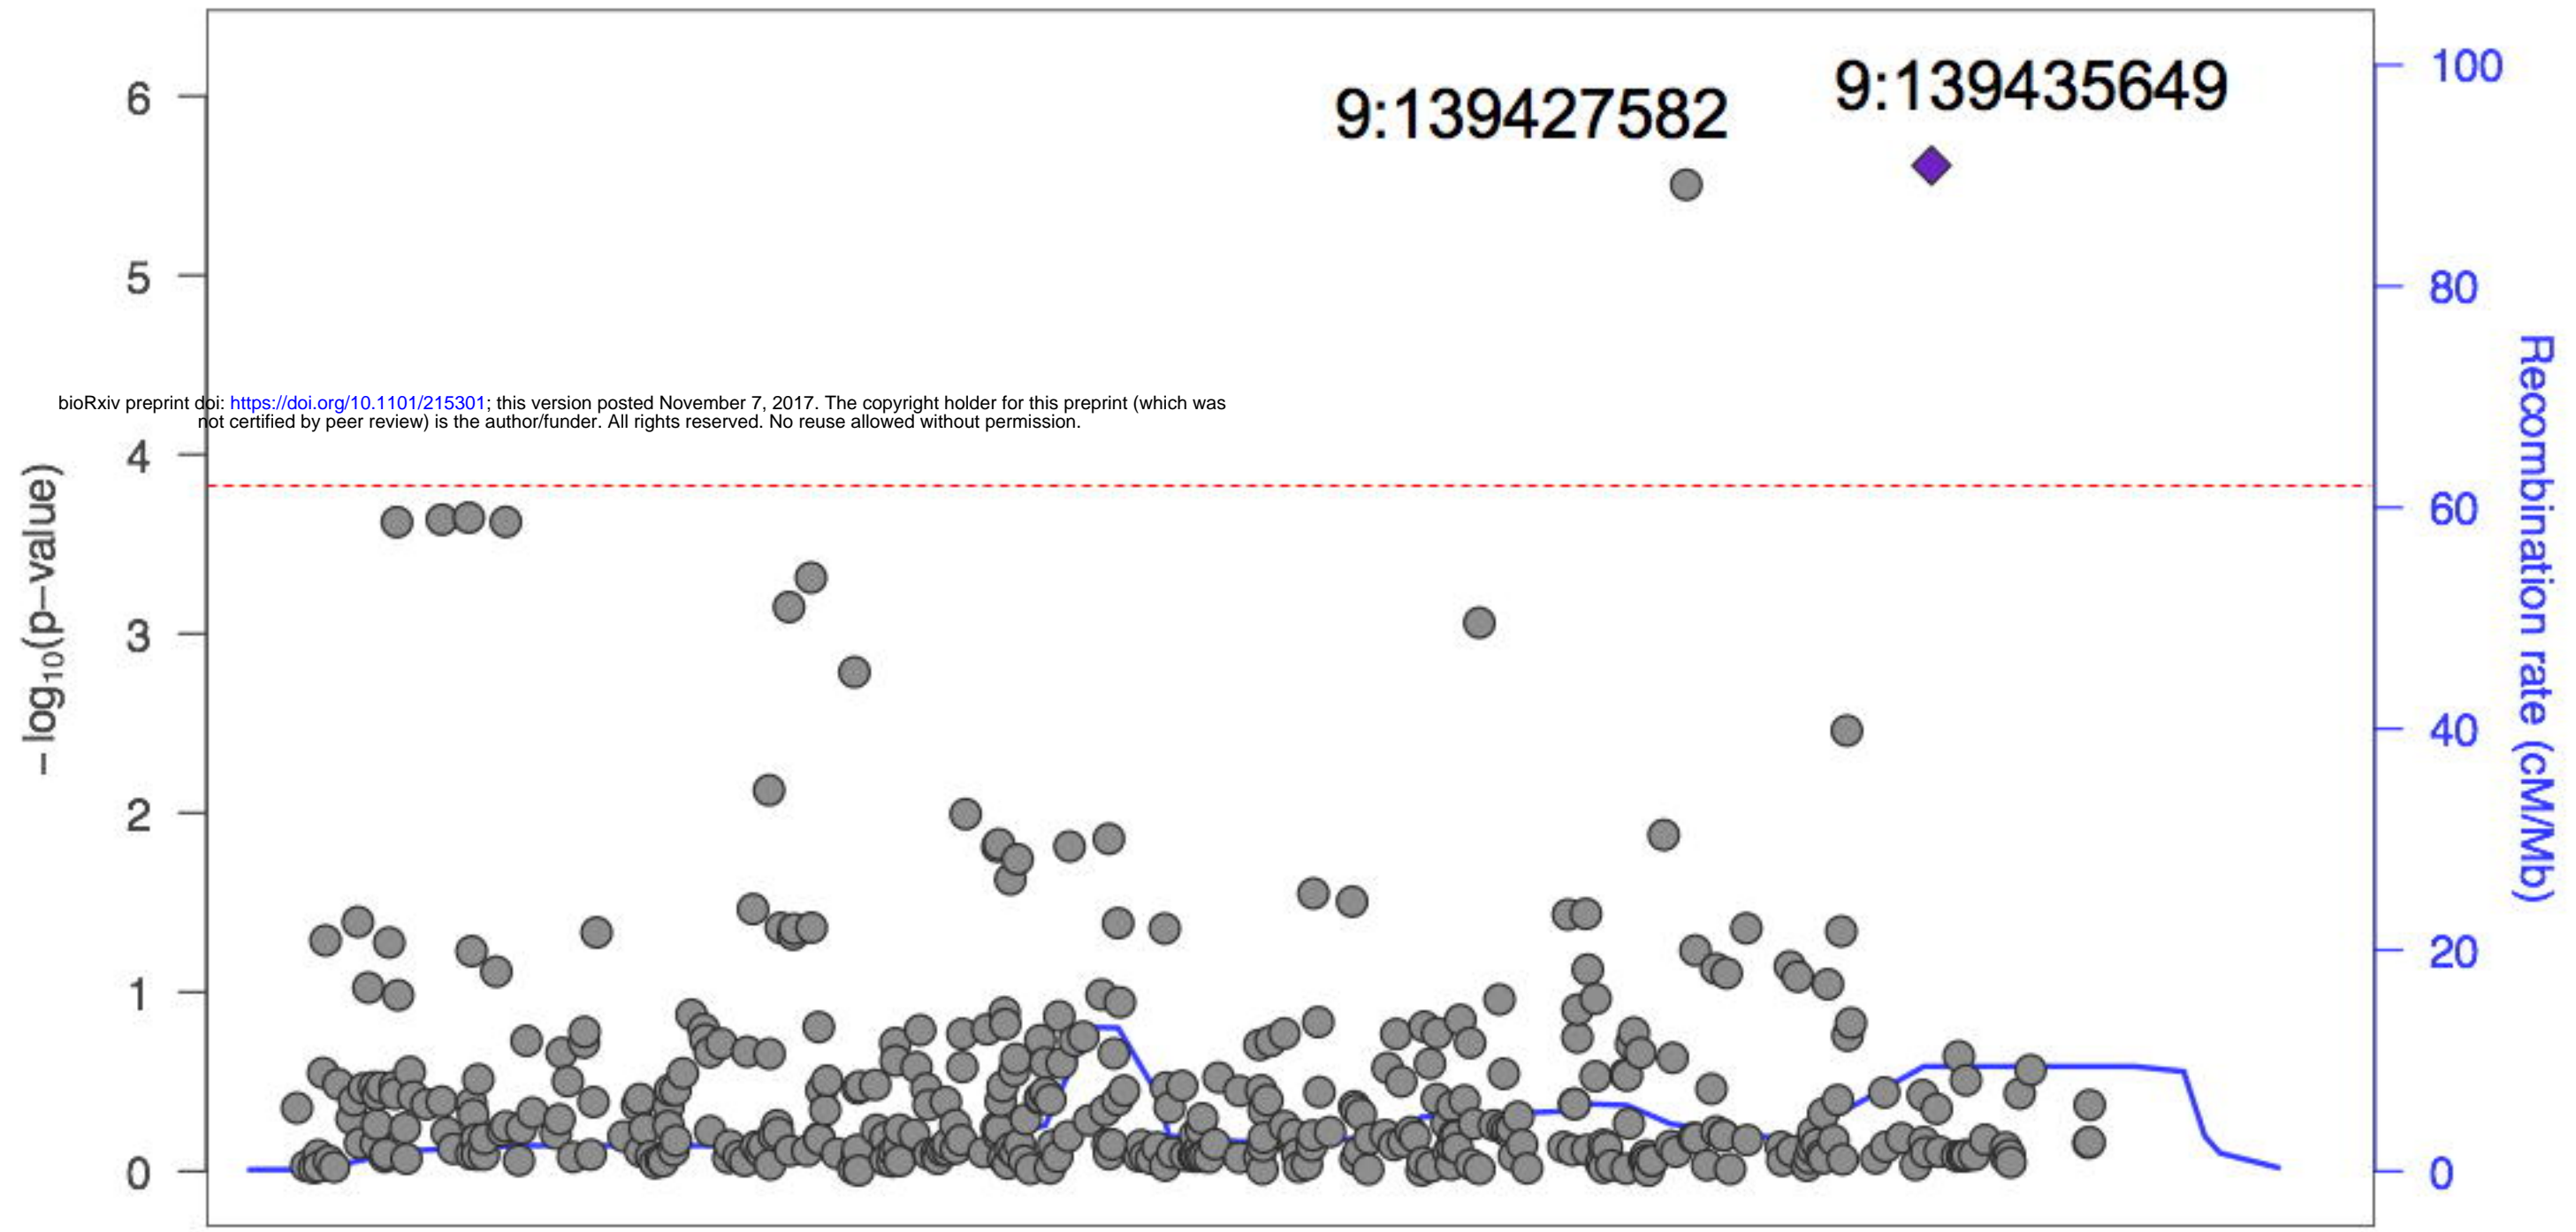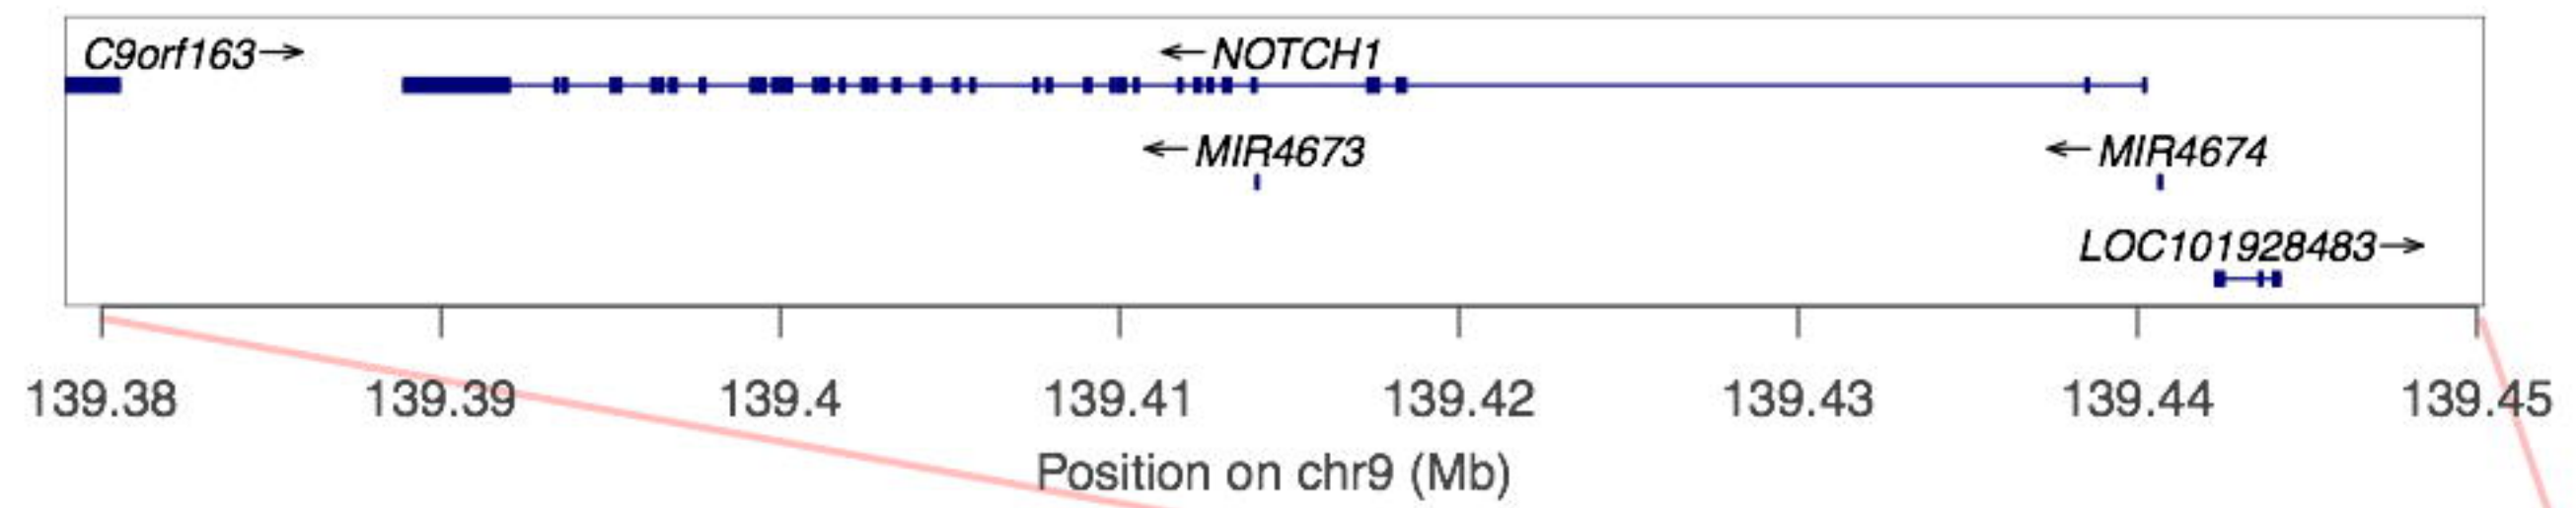

chr9

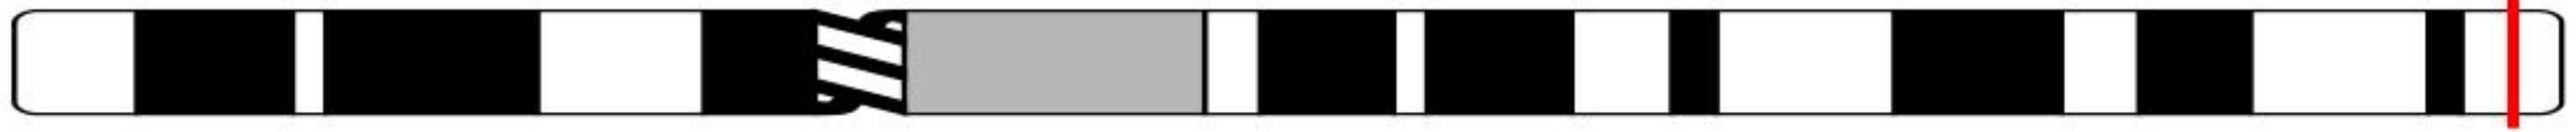

*NOTCH1*

34q3

# 9:139427582 C>T

European ancestry

16.92 [5.15, 55.54]

Non-European & mixed

12.33 [1.52, 99.89]

RE Model

15.66 [5.57, 44.02]

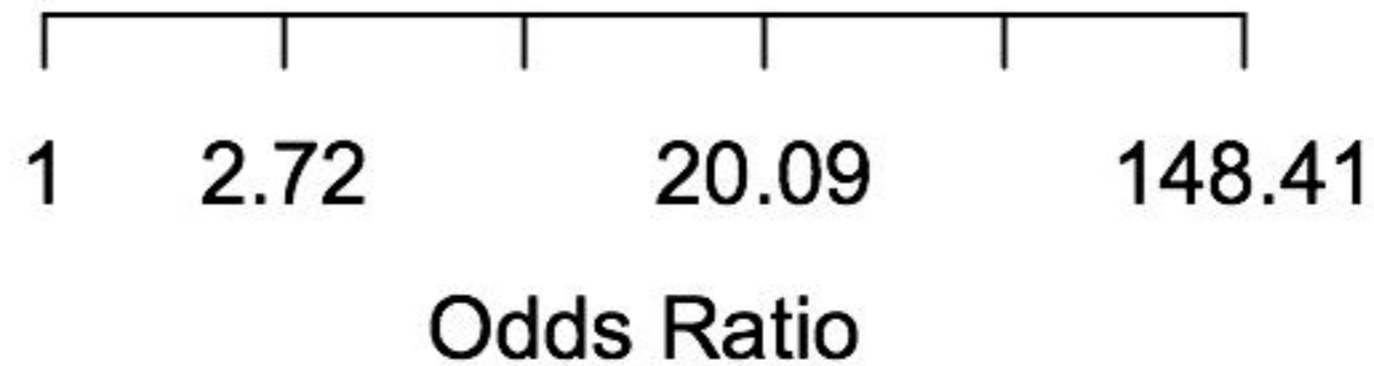

# 9:139435649 C>T

European ancestry

19.57 [5.68, 67.39]

Non-European & mixed

13.99 [1.70, 115.23]

RE Model

17.96 [6.18, 52.18]

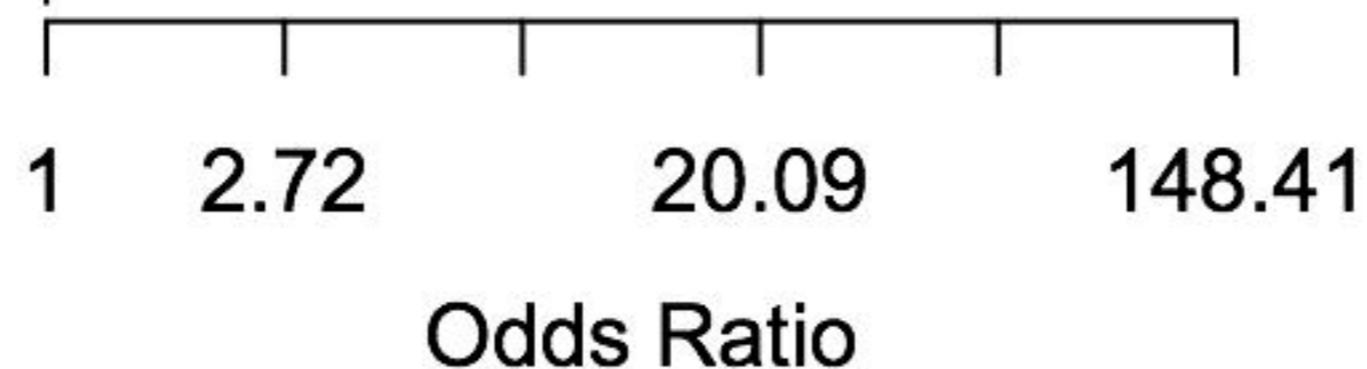

bioRxiv preprint doi: <https://doi.org/10.1101/215301>; this version posted November 7, 2017. The copyright holder for this preprint (which was not certified by peer review) is the author/funder. All rights reserved. No reuse allowed without permission.
